# Supplementary material for: Internet-Based Cognitive Behavioral Therapy Among Psychologists in a Medical Setting: A Survey on Implementation
Source: PubMed Central journal article supplement (PMC6713041; doi:10.2196/13432), 2019-08-09
Supplement: jmir_v21i8e13432_app1.pdf [file jmir_v21i8e13432_app1.pdf]

Multimedia Appendix 1. English version of the survey as distributed among medical psychologists in the Netherlands

You and your practice

|    |                                                                                                               |                                                                                                    |
|----|---------------------------------------------------------------------------------------------------------------|----------------------------------------------------------------------------------------------------|
| 1  | What is your age?                                                                                             | ..... years                                                                                        |
| 2  | What is your sex?                                                                                             | <input type="checkbox"/> Male                                                                      |
|    |                                                                                                               | <input type="checkbox"/> Female                                                                    |
| 3  | What is your professional background?                                                                         | <input type="checkbox"/> Psychologist, MSc.                                                        |
|    |                                                                                                               | <input type="checkbox"/> Healthcare psychologist                                                   |
|    |                                                                                                               | <input type="checkbox"/> Clinical psychologist                                                     |
|    |                                                                                                               | <input type="checkbox"/> Clinical neuropsychologist                                                |
|    |                                                                                                               | <input type="checkbox"/> Other .....                                                               |
| 4  | Are you a member of the National Association of Medical Psychology?                                           | <input type="checkbox"/> Yes                                                                       |
|    |                                                                                                               | <input type="checkbox"/> No                                                                        |
| 5  | How many years do you work as a psychologist?                                                                 | ..... years                                                                                        |
| 6  | How many years do you work as a <i>medical</i> psychologist?                                                  | ..... years                                                                                        |
| 7  | How many hours are you employed on a weekly basis?                                                            | ..... hours a week                                                                                 |
| 8  | In which province is your hospital positioned?                                                                | <input type="checkbox"/> Groningen                                                                 |
|    |                                                                                                               | <input type="checkbox"/> Friesland                                                                 |
|    |                                                                                                               | <input type="checkbox"/> Drenthe                                                                   |
|    |                                                                                                               | <input type="checkbox"/> Overijssel                                                                |
|    |                                                                                                               | <input type="checkbox"/> Gelderland                                                                |
|    |                                                                                                               | <input type="checkbox"/> Utrecht                                                                   |
|    |                                                                                                               | <input type="checkbox"/> Flevoland                                                                 |
|    |                                                                                                               | <input type="checkbox"/> Noord-Holland                                                             |
|    |                                                                                                               | <input type="checkbox"/> Zuid-Holland                                                              |
|    |                                                                                                               | <input type="checkbox"/> Noord-Brabant                                                             |
|    |                                                                                                               | <input type="checkbox"/> Zeeland                                                                   |
|    |                                                                                                               | <input type="checkbox"/> Limburg                                                                   |
| 9  | What kind of hospital do you work for?                                                                        | <input type="checkbox"/> General hospital                                                          |
|    |                                                                                                               | <input type="checkbox"/> Top clinical hospital                                                     |
|    |                                                                                                               | <input type="checkbox"/> Academic hospital                                                         |
|    |                                                                                                               | <input type="checkbox"/> Specialized hospital                                                      |
| 10 | How many inhabitants does the place in which the hospital is located count?                                   | <input type="checkbox"/> < 10.000 inhabitants                                                      |
|    |                                                                                                               | <input type="checkbox"/> 10.000 – 50.000 inhabitants                                               |
|    |                                                                                                               | <input type="checkbox"/> 50.000 – 150.000 inhabitants                                              |
|    |                                                                                                               | <input type="checkbox"/> 150.000 – 300.000 inhabitants                                             |
|    |                                                                                                               | <input type="checkbox"/> > 300.000 inhabitants                                                     |
| 11 | How many medical psychologists work at your hospital?                                                         | ..... medical psychologists                                                                        |
| 12 | With what reason/referral indication do clients mostly come to you as a medical psychologist? (max 3 answers) | <input type="checkbox"/> Problems in dealing with the chronic psychical complaints and limitations |
|    |                                                                                                               | <input type="checkbox"/> Anxiety and/or mood complaints                                            |
|    |                                                                                                               | <input type="checkbox"/> Social problems (e.g. relationships)                                      |
|    |                                                                                                               | <input type="checkbox"/> Pain problems                                                             |
|    |                                                                                                               | <input type="checkbox"/> Sleep problems                                                            |
|    |                                                                                                               | <input type="checkbox"/> Fatigue complaints                                                        |
|    |                                                                                                               | <input type="checkbox"/> Sexuality problems                                                        |
|    |                                                                                                               | <input type="checkbox"/> Others, namely .....                                                      |
| 13 | How many new clients do you see every month, on average?                                                      | ..... clients                                                                                      |

|    |                                                                                 |                                                                                                   |
|----|---------------------------------------------------------------------------------|---------------------------------------------------------------------------------------------------|
| 14 | Per treatment program, how many sessions do you have with a client, on average? | <input type="checkbox"/> 1 session                                                                |
|    |                                                                                 | <input type="checkbox"/> 2 to 5 sessions                                                          |
|    |                                                                                 | <input type="checkbox"/> 5 to 10 sessions                                                         |
|    |                                                                                 | <input type="checkbox"/> More than 10 sessions                                                    |
| 15 | How many minutes do you spend per client contact, on average?                   | ..... minutes                                                                                     |
| 16 | What type of help do you mainly offer your clients? (max 3 answers)             | <input type="checkbox"/> Problem clarification and diagnostics                                    |
|    |                                                                                 | <input type="checkbox"/> Psycho-education                                                         |
|    |                                                                                 | <input type="checkbox"/> Guidance/support with self-management                                    |
|    |                                                                                 | <input type="checkbox"/> Interventions aimed at improving physical functioning of the client      |
|    |                                                                                 | <input type="checkbox"/> Interventions aimed at improving psychological functioning of the client |
|    |                                                                                 | <input type="checkbox"/> Relapse prevention                                                       |
|    |                                                                                 | <input type="checkbox"/> Other, namely .....                                                      |

### You, your hospital, and technology

|    |                                                                                                                 |                                                                                          |
|----|-----------------------------------------------------------------------------------------------------------------|------------------------------------------------------------------------------------------|
| 17 | How often do you use the internet? (in general, i.e. to send an e-mail, or to search for information)           | <input type="checkbox"/> (Almost) every day                                              |
|    |                                                                                                                 | <input type="checkbox"/> Several times a week                                            |
|    |                                                                                                                 | <input type="checkbox"/> Approximately 1 day a week                                      |
|    |                                                                                                                 | <input type="checkbox"/> Less than 1 day a week                                          |
|    |                                                                                                                 | <input type="checkbox"/> (Almost) never                                                  |
| 18 | How do you rate your internet skills?                                                                           | <input type="checkbox"/> Very good                                                       |
|    |                                                                                                                 | <input type="checkbox"/> Good                                                            |
|    |                                                                                                                 | <input type="checkbox"/> Average                                                         |
|    |                                                                                                                 | <input type="checkbox"/> Poor                                                            |
|    |                                                                                                                 | <input type="checkbox"/> Very poor                                                       |
| 19 | Do you also use the internet for work?<br>If so, please indicate the purpose. (you can select multiple answers) | <input type="checkbox"/> No, never                                                       |
|    |                                                                                                                 | <input type="checkbox"/> Yes, to search for medical information                          |
|    |                                                                                                                 | <input type="checkbox"/> Yes, to search for information on insurances and reimbursements |
|    |                                                                                                                 | <input type="checkbox"/> Yes, to communicate with clients via e-mail                     |
|    |                                                                                                                 | <input type="checkbox"/> Other purpose, namely .....                                     |
| 20 | Which technology is available in your hospital? (you can select multiple answers)                               | <input type="checkbox"/> Electronic medical records                                      |
|    |                                                                                                                 | <input type="checkbox"/> Web portal with client file                                     |
|    |                                                                                                                 | <input type="checkbox"/> Online appointment tool                                         |
|    |                                                                                                                 | <input type="checkbox"/> Online recipes tool                                             |
|    |                                                                                                                 | <input type="checkbox"/> Website for client information                                  |
|    |                                                                                                                 | <input type="checkbox"/> Electronic/online screening                                     |
|    |                                                                                                                 | <input type="checkbox"/> eConsult (secure client e-mail contact)                         |
|    |                                                                                                                 | <input type="checkbox"/> Tele-medicine (e.g. video calling, remote care)                 |
|    |                                                                                                                 | <input type="checkbox"/> Online self-management/treatment modules                        |
|    |                                                                                                                 | <input type="checkbox"/> None of the above-mentioned possibilities                       |
|    |                                                                                                                 | <input type="checkbox"/> Other, namely .....                                             |

You, your hospital, and guided eHealth programs

Within hospital setting, eHealth programs can be offered in the form of guided internet-based cognitive behavioural therapy (guided-iCBT), which makes it suitable for self-management support for patients with chronic somatic complaints, and treatment of co-morbid anxiety and mood problems.

|     |                                                                                                                                                          |                                                                                                    |
|-----|----------------------------------------------------------------------------------------------------------------------------------------------------------|----------------------------------------------------------------------------------------------------|
| 21  | Have you ever seen a program for guided eHealth?                                                                                                         | <input type="checkbox"/> Yes                                                                       |
|     |                                                                                                                                                          | <input type="checkbox"/> No                                                                        |
|     |                                                                                                                                                          | <input type="checkbox"/> I don't know                                                              |
| 22  | Have you ever been trained to use a program for guided eHealth?                                                                                          | <input type="checkbox"/> Yes                                                                       |
|     |                                                                                                                                                          | <input type="checkbox"/> No                                                                        |
|     |                                                                                                                                                          | <input type="checkbox"/> I don't know                                                              |
| 23a | Have you ever used a program for guided eHealth within treatment?                                                                                        | <input type="checkbox"/> Yes                                                                       |
|     |                                                                                                                                                          | <input type="checkbox"/> No                                                                        |
|     |                                                                                                                                                          | <input type="checkbox"/> I don't know                                                              |
| 23b | If so, how many guided eHealth treatment programs did you go through, approximately?                                                                     | <input type="checkbox"/> Zero treatments / I don't know                                            |
|     |                                                                                                                                                          | <input type="checkbox"/> Less than 10 treatments                                                   |
|     |                                                                                                                                                          | <input type="checkbox"/> Between 10 and 20 treatments                                              |
|     |                                                                                                                                                          | <input type="checkbox"/> More than 20 treatments                                                   |
| 24  | For which type of complaints do you think guided eHealth programs are suitable/did you use guided eHealth programs?<br>(you can select multiple answers) | <input type="checkbox"/> Problems in dealing with the chronic psychical complaints and limitations |
|     |                                                                                                                                                          | <input type="checkbox"/> Anxiety and/or mood complaints                                            |
|     |                                                                                                                                                          | <input type="checkbox"/> Social problems (e.g. relationships)                                      |
|     |                                                                                                                                                          | <input type="checkbox"/> Pain problems                                                             |
|     |                                                                                                                                                          | <input type="checkbox"/> Sleep problems                                                            |
|     |                                                                                                                                                          | <input type="checkbox"/> Fatigue complaints                                                        |
|     |                                                                                                                                                          | <input type="checkbox"/> Sexuality problems                                                        |
|     |                                                                                                                                                          | <input type="checkbox"/> Others, namely .....                                                      |

## 25. I expect/perceive that guided eHealth programs...\*

|    |      |                                                                             | Totally disagree         | Partly disagree          | Neutral                  | Partly agree             | Totally agree            |
|----|------|-----------------------------------------------------------------------------|--------------------------|--------------------------|--------------------------|--------------------------|--------------------------|
| a  | [PE] | ... be effective for my client population.                                  | <input type="checkbox"/> | <input type="checkbox"/> | <input type="checkbox"/> | <input type="checkbox"/> | <input type="checkbox"/> |
| b  | [EE] | ... be easy to use.                                                         | <input type="checkbox"/> | <input type="checkbox"/> | <input type="checkbox"/> | <input type="checkbox"/> | <input type="checkbox"/> |
| c  | [PE] | ... be useful for my client population.                                     | <input type="checkbox"/> | <input type="checkbox"/> | <input type="checkbox"/> | <input type="checkbox"/> | <input type="checkbox"/> |
| d  | [PE] | ... increase the quality of my care provision.                              | <input type="checkbox"/> | <input type="checkbox"/> | <input type="checkbox"/> | <input type="checkbox"/> | <input type="checkbox"/> |
| e  | [SI] | ... advised by important people or colleagues in my immediate area.         | <input type="checkbox"/> | <input type="checkbox"/> | <input type="checkbox"/> | <input type="checkbox"/> | <input type="checkbox"/> |
| f  | [EE] | ... ask a lot of practice and schooling.                                    | <input type="checkbox"/> | <input type="checkbox"/> | <input type="checkbox"/> | <input type="checkbox"/> | <input type="checkbox"/> |
| g  | [PE] | ... increase the diversity of my care provision.                            | <input type="checkbox"/> | <input type="checkbox"/> | <input type="checkbox"/> | <input type="checkbox"/> | <input type="checkbox"/> |
| h  | [FC] | ... fit within the financing structures of my practice.                     | <input type="checkbox"/> | <input type="checkbox"/> | <input type="checkbox"/> | <input type="checkbox"/> | <input type="checkbox"/> |
| i  | [EE] | ... are time consuming to use.                                              | <input type="checkbox"/> | <input type="checkbox"/> | <input type="checkbox"/> | <input type="checkbox"/> | <input type="checkbox"/> |
| j  | [FC] | ... fit within the current technological state of things in my practice.    | <input type="checkbox"/> | <input type="checkbox"/> | <input type="checkbox"/> | <input type="checkbox"/> | <input type="checkbox"/> |
| k  | [PE] | ... increase the productivity of my practice.                               | <input type="checkbox"/> | <input type="checkbox"/> | <input type="checkbox"/> | <input type="checkbox"/> | <input type="checkbox"/> |
| l  | [SI] | ... be seen as a positive development among my colleagues.                  | <input type="checkbox"/> | <input type="checkbox"/> | <input type="checkbox"/> | <input type="checkbox"/> | <input type="checkbox"/> |
| m  | [PE] | ... increase the interaction or communication with my clients.              | <input type="checkbox"/> | <input type="checkbox"/> | <input type="checkbox"/> | <input type="checkbox"/> | <input type="checkbox"/> |
| n  | [FC] | ... be stimulated by my organization or manager.                            | <input type="checkbox"/> | <input type="checkbox"/> | <input type="checkbox"/> | <input type="checkbox"/> | <input type="checkbox"/> |
| o  | [EE] | ... be fun to use.                                                          | <input type="checkbox"/> | <input type="checkbox"/> | <input type="checkbox"/> | <input type="checkbox"/> | <input type="checkbox"/> |
| p  | [SI] | ... used by colleagues with a lot of respect in my hospital.                | <input type="checkbox"/> | <input type="checkbox"/> | <input type="checkbox"/> | <input type="checkbox"/> | <input type="checkbox"/> |
| q  | [PE] | ... decrease the interaction or communication with my clients.              | <input type="checkbox"/> | <input type="checkbox"/> | <input type="checkbox"/> | <input type="checkbox"/> | <input type="checkbox"/> |
| r  | [PE] | ... increase the tailoring of care among my clients.                        | <input type="checkbox"/> | <input type="checkbox"/> | <input type="checkbox"/> | <input type="checkbox"/> | <input type="checkbox"/> |
| s  | [EE] | ... ask a lot of new skills from me.                                        | <input type="checkbox"/> | <input type="checkbox"/> | <input type="checkbox"/> | <input type="checkbox"/> | <input type="checkbox"/> |
| t  | [EE] | ... are easy to gain skills in.                                             | <input type="checkbox"/> | <input type="checkbox"/> | <input type="checkbox"/> | <input type="checkbox"/> | <input type="checkbox"/> |
| u  | [SI] | ... be actively used by my colleagues.                                      | <input type="checkbox"/> | <input type="checkbox"/> | <input type="checkbox"/> | <input type="checkbox"/> | <input type="checkbox"/> |
| v  | [EE] | ... be interesting to use.                                                  | <input type="checkbox"/> | <input type="checkbox"/> | <input type="checkbox"/> | <input type="checkbox"/> | <input type="checkbox"/> |
| w  | [FC] | ... fit within my way of working.                                           | <input type="checkbox"/> | <input type="checkbox"/> | <input type="checkbox"/> | <input type="checkbox"/> | <input type="checkbox"/> |
| x  | [SI] | ... be seen as a positive development by my organization or manager.        | <input type="checkbox"/> | <input type="checkbox"/> | <input type="checkbox"/> | <input type="checkbox"/> | <input type="checkbox"/> |
| y  | [FC] | ... fit with the goals of (the management of) my organization.              | <input type="checkbox"/> | <input type="checkbox"/> | <input type="checkbox"/> | <input type="checkbox"/> | <input type="checkbox"/> |
| z  | [SI] | ... cause an increase in respect and admiration to colleagues who use this. | <input type="checkbox"/> | <input type="checkbox"/> | <input type="checkbox"/> | <input type="checkbox"/> | <input type="checkbox"/> |
| aa | [FC] | ... fit with the possibilities I receive for schooling and education.       | <input type="checkbox"/> | <input type="checkbox"/> | <input type="checkbox"/> | <input type="checkbox"/> | <input type="checkbox"/> |

- \* [PE] = Performance Expectancy  
 [EE] = Effort Expectancy  
 [SI] = Social Influence  
 [FC] = Facilitating Conditions

|    |      |                                                                                  | Totally disagree         | Partly disagree          | Neutral                  | Partly agree             | Totally agree            |
|----|------|----------------------------------------------------------------------------------|--------------------------|--------------------------|--------------------------|--------------------------|--------------------------|
| 26 | [BI] | I would like to use/keep using guided eHealth programs.                          | <input type="checkbox"/> | <input type="checkbox"/> | <input type="checkbox"/> | <input type="checkbox"/> | <input type="checkbox"/> |
| 27 | [BI] | I intend to use/keep using guided eHealth programs.                              | <input type="checkbox"/> | <input type="checkbox"/> | <input type="checkbox"/> | <input type="checkbox"/> | <input type="checkbox"/> |
| 28 | [BI] | I expect to use/keep using guided eHealth programs in the future.                | <input type="checkbox"/> | <input type="checkbox"/> | <input type="checkbox"/> | <input type="checkbox"/> | <input type="checkbox"/> |
| 29 |      | It is/remains my own choice to continue using guided eHealth programs.           | <input type="checkbox"/> | <input type="checkbox"/> | <input type="checkbox"/> | <input type="checkbox"/> | <input type="checkbox"/> |
| 30 |      | My management will put pressure on me to continue using guided eHealth programs. | <input type="checkbox"/> | <input type="checkbox"/> | <input type="checkbox"/> | <input type="checkbox"/> | <input type="checkbox"/> |

|    |      |                                                                                   |                                                         |
|----|------|-----------------------------------------------------------------------------------|---------------------------------------------------------|
| 31 | [BI] | Within which time frame do you expect to use guided eHealth programs?             | <input type="checkbox"/> I currently use them already   |
|    |      |                                                                                   | <input type="checkbox"/> Within the next six months     |
|    |      |                                                                                   | <input type="checkbox"/> Within the next year           |
|    |      |                                                                                   | <input type="checkbox"/> Within two to five years       |
|    |      |                                                                                   | <input type="checkbox"/> Not within the next five years |
|    |      |                                                                                   | <input type="checkbox"/> Never                          |
| 32 |      | Are you interested in receiving (more) information about guided eHealth programs? | <input type="checkbox"/> Yes                            |
|    |      |                                                                                   | <input type="checkbox"/> No                             |
| 33 |      | Are you interested in a training course in the use of guided eHealth programs?    | <input type="checkbox"/> Yes                            |
|    |      |                                                                                   | <input type="checkbox"/> No                             |
| 34 |      | If so, what kind of information or training would you like to receive?            | .....                                                   |

\* [BI] = Behavioral Intention
